# Supplementary material for: Perylene diimide arrays: promising candidates for non-fullerene organic solar cells
Source: Royal Society of Chemistry journal article supplement (doi:10.1039/c7tc04726f), 2017-01-01
Supplement: c7tc04726f1.pdf [file c7tc04726f1.pdf]

Electronic Supporting Information for

## **Perylene Diimides Arrays: the Promising Candidates for Non-fullerene Organic Solar Cells**

Helin Wang, Lingcheng Chen\* and Yi Xiao\*

State Key Laboratory of Fine Chemicals, Dalian University of Technology, Dalian 116024, China  
lcchen@dlut.edu.cn; xiaoyi@dlut.edu.cn

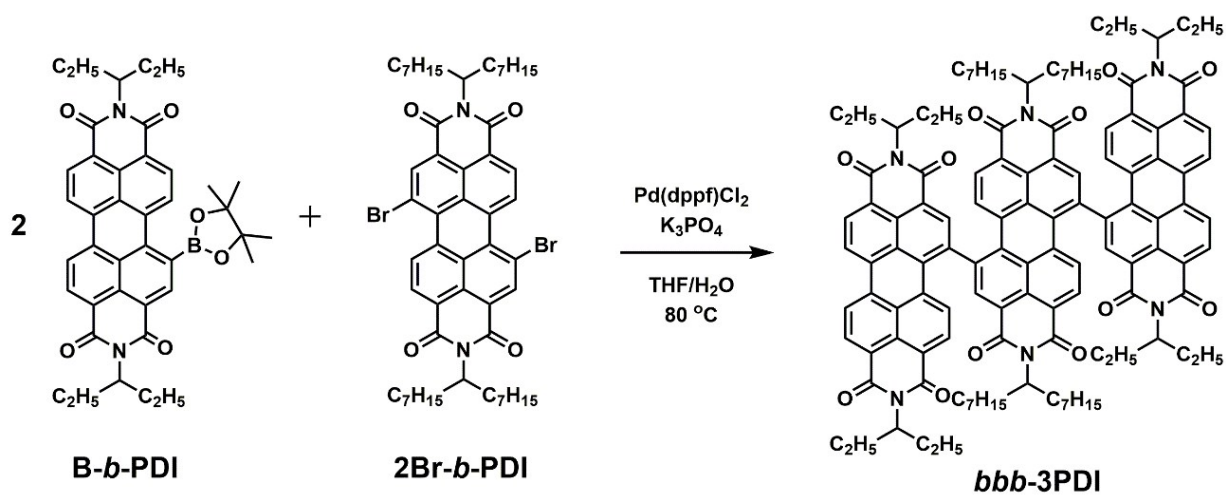

Scheme S1. Synthesis of *bbb*-3PDI.

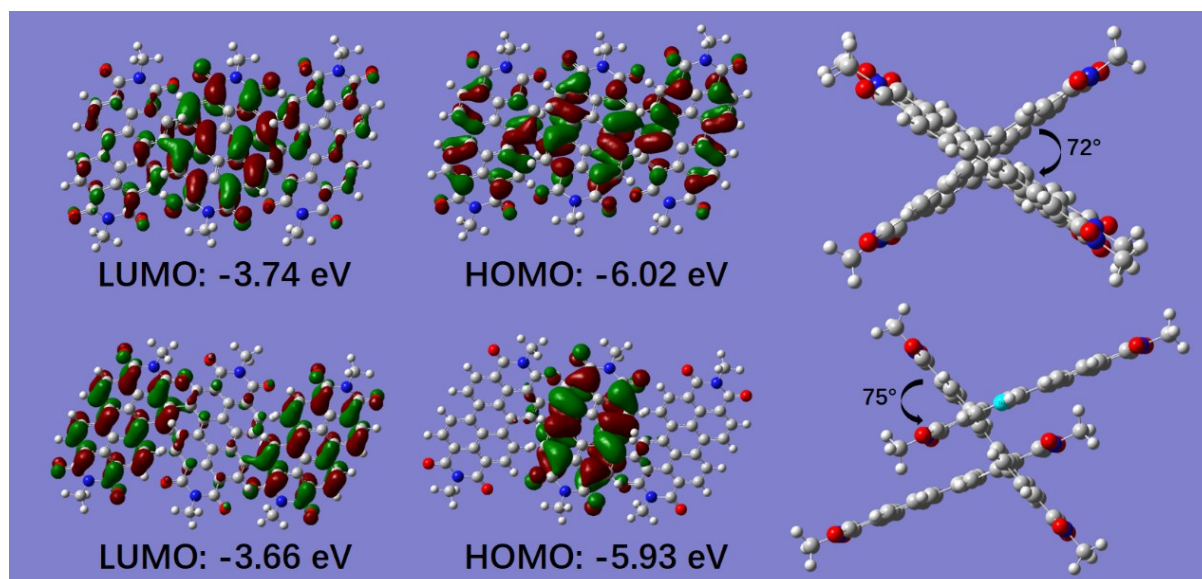

**Fig. S1** Theoretical calculations of *bbb-3PDI* (upper) and *obo-3PDI* (below) using DFT calculations at the B3LYP/6-31G (d, p) level.

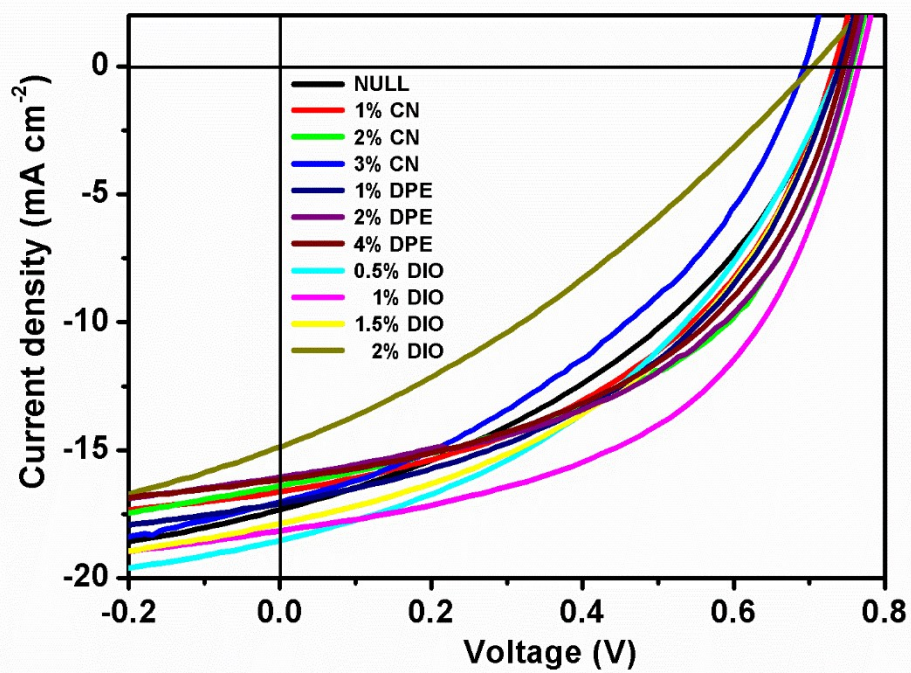

Fig. S2  $J$ - $V$  curves of PTB7-Th:bbb-3PDI (1:1) with different additives.

**Table S1.** Summary of device parameters of PTB7-Th:*bbb*-3PDI (1:1) with different additives.

| Additives<br>[volume] | J <sub>sc</sub><br>[mA cm <sup>-2</sup> ] | V <sub>oc</sub><br>[V] | FF<br>[%] | PCE<br>[%] |
|-----------------------|-------------------------------------------|------------------------|-----------|------------|
| NO                    | 17.33                                     | 0.740                  | 40.1      | 5.14       |
| 1% CN                 | 16.56                                     | 0.731                  | 45.9      | 5.56       |
| 2% CN                 | 16.39                                     | 0.755                  | 49.1      | 6.08       |
| 3% CN                 | 17.00                                     | 0.690                  | 39.3      | 4.61       |
| 1% DPE                | 16.79                                     | 0.742                  | 45.0      | 5.61       |
| 2% DPE                | 16.02                                     | 0.753                  | 49.8      | 6.01       |
| 4% DPE                | 16.09                                     | 0.745                  | 48.4      | 5.80       |
| 0.5% DIO              | 18.49                                     | 0.738                  | 41.1      | 5.61       |
| 1% DIO                | 18.13                                     | 0.764                  | 51.4      | 7.12       |
| 1.5% DIO              | 17.84                                     | 0.738                  | 43.7      | 5.75       |
| 2% DIO                | 14.91                                     | 0.704                  | 31.7      | 3.33       |

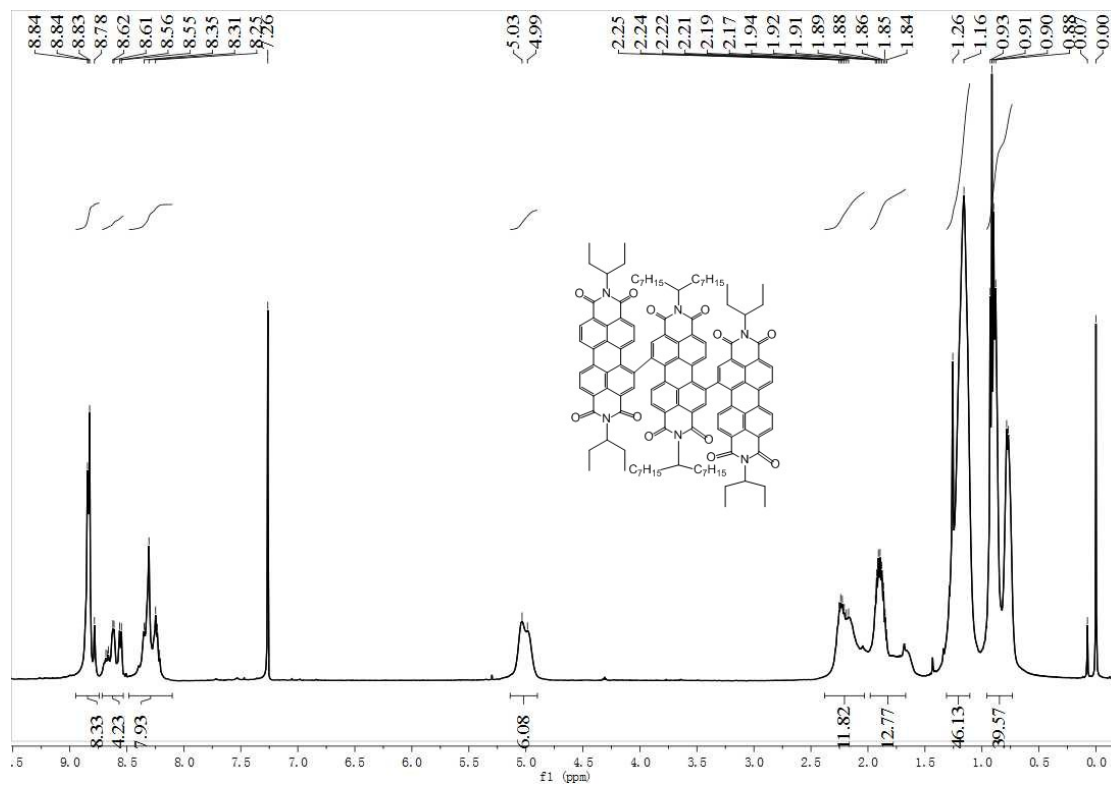

**Fig. S3**  $^1\text{H}$  NMR spectrum of *bbb*-3PDI in  $\text{CDCl}_3$ .

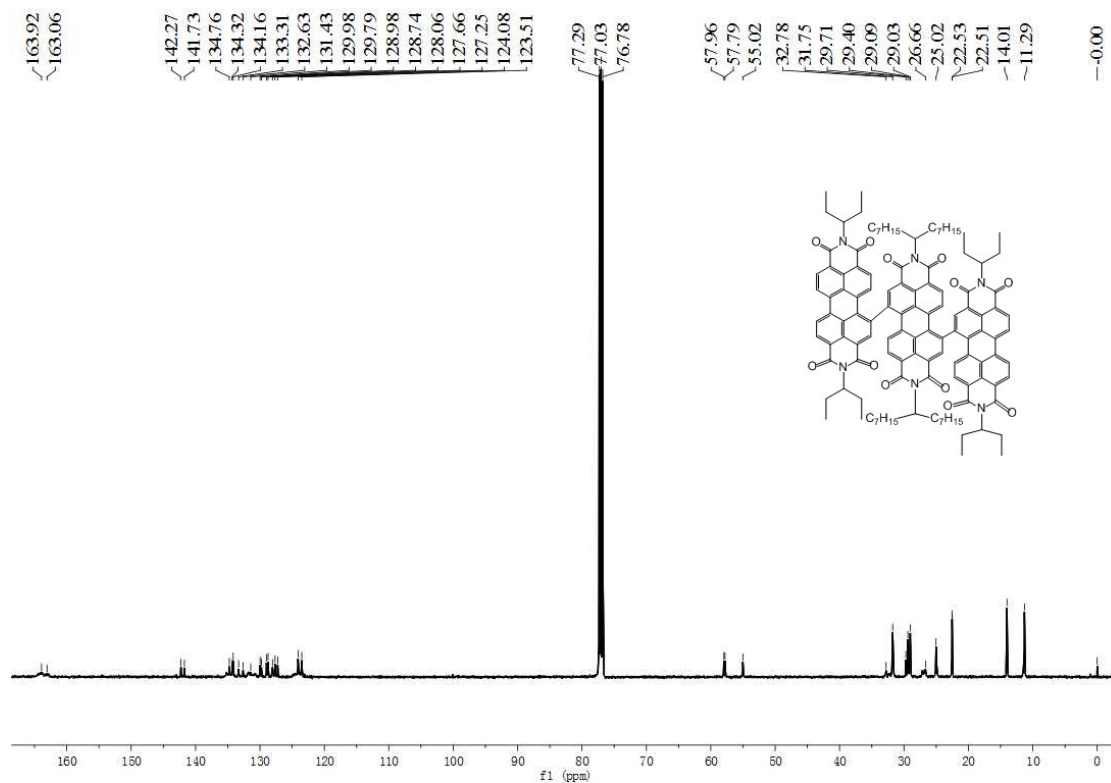

**Fig. S4**  $^{13}C$  NMR spectrum of *bbb*-3PDI in  $CDCl_3$ .
